# Supplementary material for: Genomic Insights into Idiopathic Granulomatous Mastitis through Whole Exome Sequencing: A Case Report of Eight Patients
Source: Preprints.org preprint supplement (doi:10.20944/preprints202408.0010.v1), 2024-08-01
Supplement: Supplementary file 1 [file supplementary]

**Genomic insights into idiopathic granulomatous mastitis through whole exome sequencing: A case report of eight patients**

Supplementary materials

| **Item** | **Title** | **Main text reference** | **Supplementary materials page number** |
| --- | --- | --- | --- |
| Supplementary Table 1 | Concentration and yield of extracted genomic DNA before WES library preparation. | Page 3 | 2 |
| Supplementary Figure 1 | Yield of extracted genomic DNA before whole exome sequencing (WES) library preparation. | Page 3 | 3 |
| Supplementary Table 2 | Concentration and yield from whole exome sequencing (WES) library preparation. | Page 3 | 4 |
| Supplementary Table 3 | Summary statistics of sequencing performance, coverage metrics and sequencing reads quality control values. | Page 3 | 5 |
| Supplementary Table 4 | Somatic variants identified from whole exome sequencing (WES) of blood samples through *Strelka2* and *Mutect2* variant calling. | Page 4 Page 8 | 7 |
| Supplementary Table 5 | *EnrichR* functional enrichment of genes altered in protein-truncating variants (PTVs) called by *Strelka2* and *Mutect2* matched blood-tissue variant calling, using 2019 version of Kyoto Encyclopedia of Genes and Genomes (KEGG) knowledge base. | Page 7 | 8 |
| Supplementary Figure 2 | Visualisation of enriched pathways from Supplementary Table 5, ordered by *p*-value. | Page 7 | 10 |
| Supplementary Table 6 | Somatic variants identified from whole exome sequencing (WES) of blood samples that overlap across *Strelka2* and *Mutect2* variant calling. | Page 8 | 11 |
| Supplementary Table 7 | Variants identified through whole exome sequencing (WES) validation with Sanger sequencing. | Page 8 | 12 |

**Supplementary Table 1.** Concentration and yield of extracted genomic DNA before WES library preparation.

| **Case** | **Sample** | **Nucleic Acid** | **Unit** | **Yield (ng)** |
| --- | --- | --- | --- | --- |
| 1 | Tissue | 9.6 | ng/μl | 480 |
| 2 | Tissue | 13.4 | ng/μl | 670 |
| 3 | Tissue | 12.5 | ng/μl | 625 |
| 4 | Tissue | 13.6 | ng/μl | 680 |
| 5 | Tissue | 13 | ng/μl | 650 |
| 6 | Tissue | 13.4 | ng/μl | 670 |
| 7 | Tissue | 13 | ng/μl | 650 |
| 8 | Tissue | 11.6 | ng/μl | 580 |
| 1 | Blood | 12.1 | ng/μl | 605 |
| 2 | Blood | 11 | ng/μl | 550 |
| 3 | Blood | 10.5 | ng/μl | 525 |
| 4 | Blood | 9.8 | ng/μl | 490 |
| 5 | Blood | 9.7 | ng/μl | 485 |
| 6 | Blood | 8.4 | ng/μl | 420 |
| 7 | Blood | 10.9 | ng/μl | 545 |
| 8 | Blood | 13 | ng/μl | 650 |

**Supplementary Table 2.** Yield of extracted genomic DNA before whole exome sequencing (WES) library preparation.

**Supplementary Table 2.** Concentration and yield from whole exome sequencing (WES) library preparation.

| **Case** | **Sample Type** | **Concentration (ng/ul)** | **Concentration (nM)** | **Peak (bp)** | **Yield (ng)** |
| --- | --- | --- | --- | --- | --- |
| 1 | Tissue | 3.83 | 16.3 | 315 | 191.5 |
| 2 | Tissue | 7.42 | 31 | 324 | 371 |
| 3 | Tissue | 8.59 | 35.9 | 332 | 429.5 |
| 4 | Tissue | 7.2 | 31.5 | 322 | 360 |
| 5 | Tissue | 9.45 | 41.9 | 315 | 472.5 |
| 6 | Tissue | 9.58 | 40.8 | 320 | 479 |
| 7 | Tissue | 9.52 | 41.6 | 320 | 476 |
| 8 | Tissue | 11.1 | 47.5 | 318 | 555 |
| 1 | Blood | 11.5 | 48.2 | 329 | 575 |
| 2 | Blood | 11.7 | 49.6 | 323 | 585 |
| 3 | Blood | 5.13 | 21.5 | 328 | 256.5 |
| 4 | Blood | 5.52 | 23.1 | 329 | 276 |
| 5 | Blood | 5.47 | 22.7 | 337 | 273.5 |
| 6 | Blood | 5.15 | 21.6 | 335 | 257.5 |
| 7 | Blood | 6.01 | 25.6 | 320 | 300.5 |
| 8 | Blood | 6.24 | 26.5 | 325 | 312 |

**Supplementary Table 3.** Summary statistics of sequencing performance, coverage metrics and sequencing reads quality control values.

| **Case-Sample Type** | **Yield (Mbases1, thousands)** | **Total reads (millions)** | **% PF2 clusters** | **% >= Q30 bases3** | **Mean Quality score** | **Mapping efficiency (%)** | **Duplicate reads (%)** | **Mean Coverage4 Depth (x)** | **% coverage region4 >20x** | **% GC content5** |
| --- | --- | --- | --- | --- | --- | --- | --- | --- | --- | --- |
| 1-Tissue | 13,271 | 88 | 100 | 68.45 | 32.08 | 99.99819302 | 13.60571419 | 34.71 | 100 | 42.4 |
| 2-Tissue | 15,912 | 106 | 100 | 81.79 | 35.45 | 99.99896609 | 16.5703934 | 44.46 | 100 | 43.5 |
| 3-Tissue | 17,606 | 117 | 100 | 70.38 | 32.57 | 99.99864224 | 14.22206515 | 45.49 | 100 | 42.3 |
| 4-Tissue | 17,631 | 118 | 100 | 79.45 | 34.85 | 99.99898396 | 16.39147259 | 48.09 | 100 | 43.2 |
| 5-Tissue | 17,299 | 115 | 100 | 75.64 | 33.87 | 99.99889577 | 16.91178391 | 47.93 | 100 | 43.2 |
| 6-Tissue | 19,107 | 127 | 100 | 83.61 | 35.91 | 99.99904566 | 19.87942732 | 53.51 | 100 | 43.4 |
| 7-Tissue | 15,278 | 102 | 100 | 78.35 | 34.5 | 99.99903568 | 16.54351951 | 43.61 | 100 | 43.3 |
| 8-Tissue | 13,276 | 89 | 100 | 84 | 36.01 | 99.99897287 | 18.30835869 | 38.6 | 100 | 43.7 |
| 1-Blood | 10,478 | 70 | 100 | 81.34 | 35.33 | 99.99853774 | 17.7817895 | 26.66 | 100 | 43.4 |
| 2-Blood | 11,066 | 74 | 100 | 82.23 | 35.56 | 99.99812482 | 18.11617778 | 30.99 | 100 | 43.3 |
| 3-Blood | 11,759 | 78 | 100 | 81.35 | 35.34 | 99.99785608 | 18.88808341 | 31.93 | 100 | 43.3 |
| 4-Blood | 9,728 | 65 | 100 | 74.34 | 33.55 | 99.997887 | 14.37341294 | 26.75 | 100 | 42.9 |
| 5-Blood | 10,760 | 72 | 100 | 78.97 | 34.71 | 99.99815122 | 18.65911251 | 30.26 | 100 | 43.2 |
| 6-Blood | 11,824 | 79 | 100 | 73.42 | 33.31 | 99.99768945 | 17.99989554 | 32.36 | 100 | 42.9 |
| 7-Blood | 11,219 | 75 | 100 | 81.88 | 35.46 | 99.99816468 | 18.52028221 | 31.85 | 100 | 43.4 |
| 8-Blood | 11,659 | 78 | 100 | 82.39 | 35.59 | 99.99817696 | 17.9521995 | 32.78 | 100 | 43.2 |
| ***Mean (Tissue)*** | 16,172.5 | 107.8 | 100.0 | 77.7 | 34.4 | 100.0 | 16.6 | 44.6 | 100 | 43 |
| ***Mean (Blood)*** | 11,061.6 | 73.7 | 100.0 | 79.5 | 34.9 | 100.0 | 17.8 | 30.4 | 100 | 43 |
| ***Mean (All samples)*** | 13,617.1 | 90.8 | 100.0 | 78.6 | 34.6 | 100.0 | 17.2 | 37.5 | 100 | 43 |

1Total number of megabases (millions of bases) of DNA sequenced, reported in thousands. This measures the output of a sequencing run.

2Percentage of clusters passing filter: Proportion of clusters (groups of DNA sequences) that pass quality filters during sequencing.

3Percentage of bases with a quality score of 30 or higher. High percentages suggest high-quality sequencing data.

4Coverage depth and coverage region corresponds to the target exonic regions.

5Percentage of guanine (G) and cytosine (C) bases in the DNA sequence.

**Supplementary Table 4.** Somatic variants identified from whole exome sequencing (WES) of blood samples through *Strelka2* and *Mutect2* variant calling.

| **Case** | **Somatic variants** | | **SNVs1** | | **Indels2** | | **PTVs3** | | **Pathogenic4** | | **Pathogenic/Likely Pathogenic4** | | **Likely Pathogenic4** | |
| --- | --- | --- | --- | --- | --- | --- | --- | --- | --- | --- | --- | --- | --- | --- |
| ***Strelka2*** | ***Mutect2*** | ***Strelka2*** | ***Mutect2*** | ***Strelka2*** | ***Mutect2*** | ***Strelka2*** | ***Mutect2*** | ***Strelka2*** | ***Mutect2*** | ***Strelka2*** | ***Mutect2*** | ***Strelka2*** | ***Mutect2*** |
| 1 | 7727 | 696 | 5915 | 677 | 1812 | 19 | 95 | 44 | 1 | 1 | 0 | 0 | 0 | 0 |
| 2 | 6075 | 794 | 4518 | 786 | 1557 | 8 | 61 | 50 | 0 | 0 | 0 | 0 | 0 | 0 |
| 3 | 6089 | 959 | 4592 | 951 | 1497 | 8 | 62 | 66 | 0 | 1 | 0 | 0 | 0 | 0 |
| 4 | 11947 | 614 | 9992 | 605 | 1955 | 9 | 141 | 53 | 0 | 1 | 0 | 0 | 0 | 1 |
| 5 | 6387 | 840 | 4716 | 825 | 1671 | 15 | 72 | 60 | 1 | 1 | 0 | 1 | 0 | 0 |
| 6 | 7328 | 968 | 5630 | 957 | 1698 | 11 | 75 | 70 | 1 | 3 | 0 | 0 | 1 | 1 |
| 7 | 5391 | 732 | 3798 | 723 | 1593 | 9 | 56 | 43 | 1 | 1 | 0 | 0 | 0 | 0 |
| 8 | 5821 | 891 | 4412 | 878 | 1409 | 13 | 58 | 59 | 0 | 1 | 0 | 1 | 0 | 0 |
| *Median (range)* | 6238 (5391-11947) | 817 (614-968) | 4654 (3798-9992) | 805.5 (605-957) | 1632(1409-1955) | 10 (8-19) | 67 (56-141) | 56 (43-70) | 0.5 (0-1) | 1 (0-3) | 0 (0-0) | 0 (0-1) | 0 (0-1) | 0 (0-1) |

1 Single nucleotide variants

2 Insertions and deletions

3 Protein-truncating variants. These correspond to variants annotated as nonsense mutations, or frameshift insertions or deletions by GATK4 *Funcotator*.

4 *ClinVar* annotation of pathogenicity within GATK4 *Funcotator* variant annotation.

**Supplementary Table 5.** *EnrichR* functional enrichment of genes altered in protein-truncating variants (PTVs) called by *Strelka2* and *Mutect2* matched blood-tissue variant calling, using 2019 version of Kyoto Encyclopedia of Genes and Genomes (KEGG) knowledge base.

| **Enriched pathway** | **Overlap** | ***p*-value** | **Adjusted *p*-value** | **Odds ratio** | **Combined score** | **Genes** |
| --- | --- | --- | --- | --- | --- | --- |
| Terpenoid backbone biosynthesis | 1/22 | 0.0526 | 0.481 | 19.772 | 58.242916 | IDI2 |
| Protein export | 1/23 | 0.0549 | 0.481 | 18.872 | 54.7763046 | SEC62 |
| Protein processing in endoplasmic reticulum | 2/165 | 0.0618 | 0.481 | 5.166 | 14.3790161 | DNAJB12;  SEC62 |
| Huntington disease | 2/193 | 0.0811 | 0.481 | 4.402 | 11.0573367 | DNAH1;  DNAH9 |
| Vasopressin-regulated water reabsorption | 1/44 | 0.1024 | 0.481 | 9.645 | 21.9790026 | DYNC1I2 |
| ABC transporters | 1/45 | 0.1046 | 0.481 | 9.426 | 21.2777177 | ABCB5 |
| Regulation of lipolysis in adipocytes | 1/55 | 0.1264 | 0.481 | 7.676 | 15.8788045 | PTGER3 |
| Adherens junction | 1/72 | 0.1622 | 0.481 | 5.833 | 10.6117607 | FER |
| Salmonella infection | 1/86 | 0.1906 | 0.481 | 4.869 | 8.07205861 | DYNC1I2 |
| Protein digestion and absorption | 1/90 | 0.1985 | 0.481 | 4.649 | 7.51796421 | COL14A1 |
| mRNA surveillance pathway | 1/91 | 0.2005 | 0.481 | 4.597 | 7.38859473 | SMG1 |
| Toll-like receptor signaling pathway | 1/104 | 0.2257 | 0.481 | 4.015 | 5.97620039 | IFNAR1 |
| Osteoclast differentiation | 1/127 | 0.2684 | 0.481 | 3.278 | 4.31143448 | IFNAR1 |
| Natural killer cell mediated cytotoxicity | 1/131 | 0.2756 | 0.481 | 3.176 | 4.09396586 | IFNAR1 |
| Estrogen signaling pathway | 1/137 | 0.2862 | 0.481 | 3.035 | 3.79702497 | FKBP4 |
| Measles | 1/138 | 0.2880 | 0.481 | 3.013 | 3.75064154 | IFNAR1 |
| Phagosome | 1/152 | 0.3122 | 0.481 | 2.732 | 3.18001247 | DYNC1I2 |
| Hepatitis C | 1/155 | 0.3173 | 0.481 | 2.678 | 3.07435193 | IFNAR1 |
| Cellular senescence | 1/160 | 0.3257 | 0.481 | 2.593 | 2.90925752 | HIPK3 |
| JAK-STAT signaling pathway | 1/162 | 0.3290 | 0.481 | 2.561 | 2.84680162 | IFNAR1 |
| Necroptosis | 1/162 | 0.3290 | 0.481 | 2.561 | 2.84680162 | IFNAR1 |
| Hepatitis B | 1/163 | 0.3307 | 0.481 | 2.545 | 2.81629828 | IFNAR1 |
| Influenza A | 1/171 | 0.3438 | 0.481 | 2.424 | 2.58838978 | IFNAR1 |
| NOD-like receptor signaling pathway | 1/178 | 0.3550 | 0.481 | 2.327 | 2.41007428 | IFNAR1 |
| Axon guidance | 1/181 | 0.3598 | 0.481 | 2.288 | 2.33899979 | ROBO1 |
| Kaposi sarcoma-associated herpesvirus infection | 1/186 | 0.3677 | 0.481 | 2.226 | 2.2270141 | IFNAR1 |
| Calcium signaling pathway | 1/188 | 0.3708 | 0.481 | 2.202 | 2.18434688 | PTGER3 |
| Pathways in cancer | 2/530 | 0.3742 | 0.481 | 1.565 | 1.53879087 | PTGER3;  IFNAR1 |
| Epstein-Barr virus infection | 1/201 | 0.3908 | 0.485 | 2.057 | 1.93327146 | IFNAR1 |
| cAMP signaling pathway | 1/212 | 0.4071 | 0.489 | 1.949 | 1.75139935 | PTGER3 |
| Human cytomegalovirus infection | 1/225 | 0.4260 | 0.495 | 1.835 | 1.56580724 | PTGER3 |
| Cytokine-cytokine receptor interaction | 1/294 | 0.5164 | 0.581 | 1.398 | 0.92370317 | IFNAR1 |
| Human papillomavirus infection | 1/330 | 0.5579 | 0.600 | 1.243 | 0.72509741 | IFNAR1 |
| Neuroactive ligand-receptor interaction | 1/338 | 0.5666 | 0.600 | 1.213 | 0.68875736 | PTGER3 |
| PI3K-Akt signaling pathway | 1/354 | 0.5836 | 0.600 | 1.157 | 0.62287812 | IFNAR1 |
| Herpes simplex virus 1 infection | 1/492 | 0.7053 | 0.705 | 0.826 | 0.28822203 | IFNAR1 |

**Supplementary Figure 2.** Visualisation of enriched pathways from Supplementary Table 5, ordered by *p*-value.


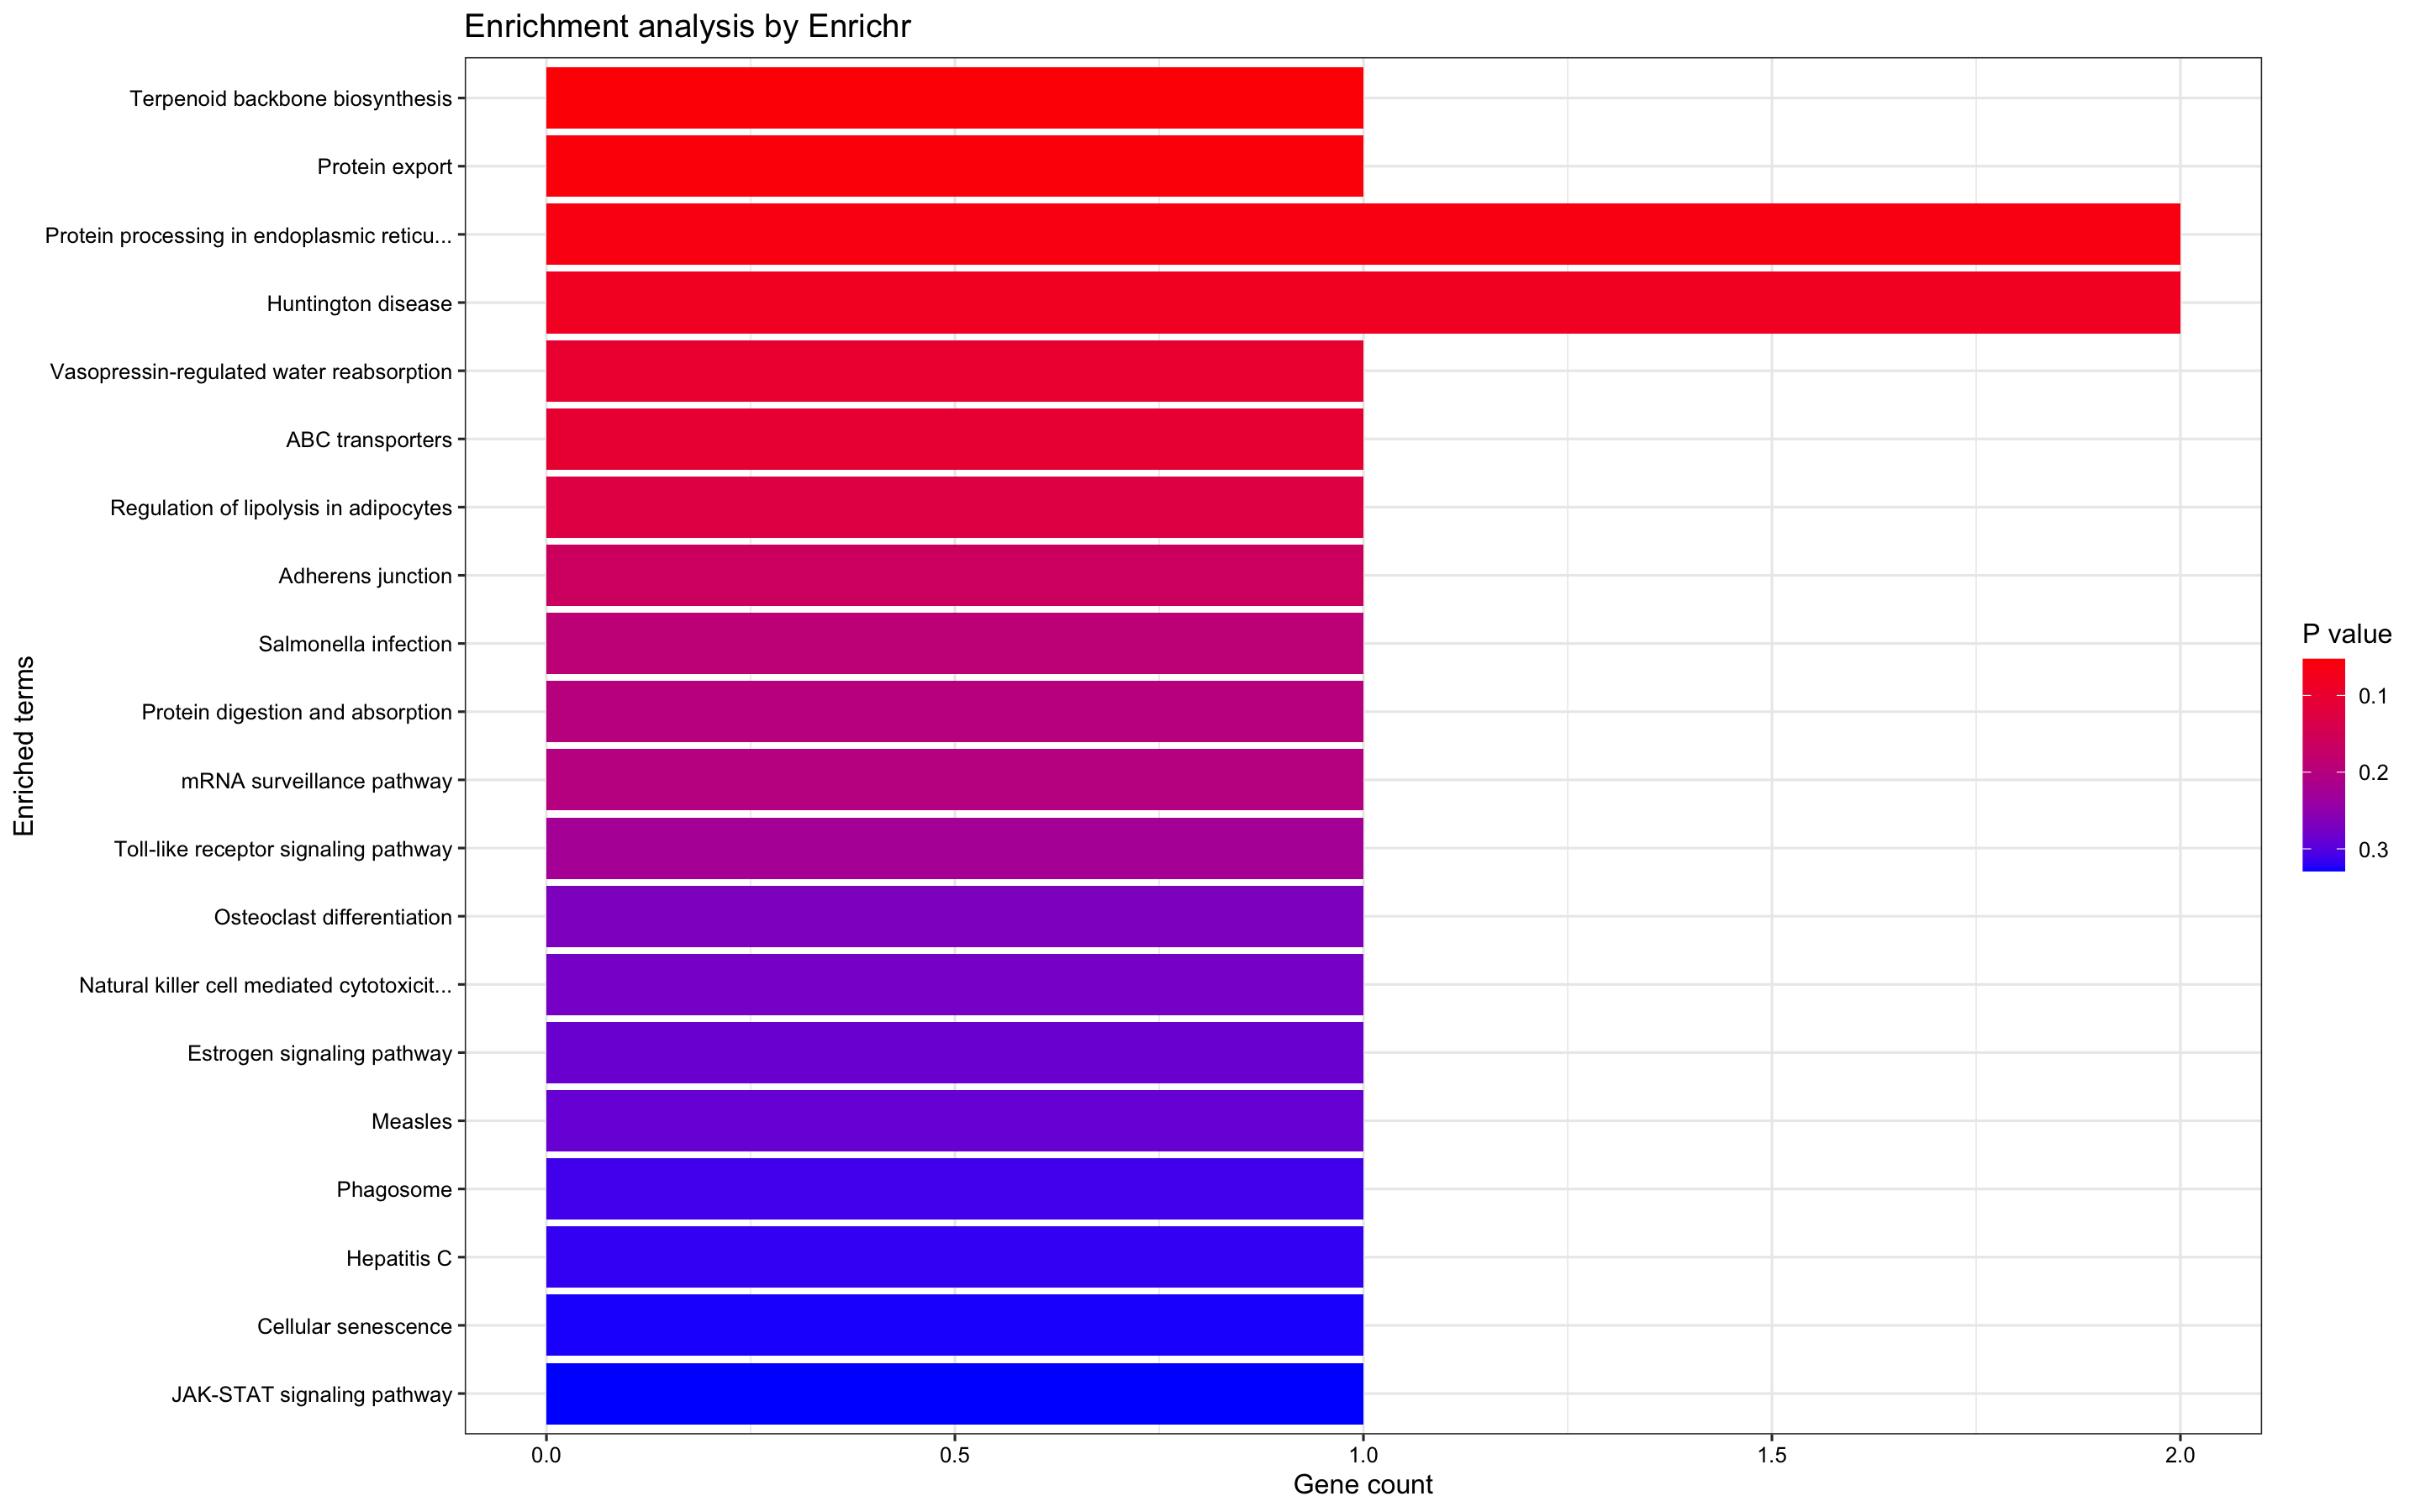


**Supplementary Table 6.** Somatic variants identified from whole exome sequencing (WES) of blood samples that overlap across *Strelka2* and *Mutect2* variant calling.

| **Case** | **Somatic variants** | **SNVs1** | **Indels2** | **PTVs3** | **Pathogenic4** | **Pathogenic / Likely Pathogenic4** | **Likely Pathogenic4** |
| --- | --- | --- | --- | --- | --- | --- | --- |
| 1 | 37 | 32 | 5 | 0 | 0 | 0 | 0 |
| 2 | 73 | 62 | 11 | 2 | 0 | 0 | 0 |
| 3 | 74 | 67 | 7 | 3 | 0 | 0 | 0 |
| 4 | 78 | 66 | 12 | 1 | 0 | 0 | 0 |
| 5 | 68 | 58 | 10 | 1 | 0 | 0 | 0 |
| 6 | 81 | 63 | 18 | 2 | 0 | 0 | 0 |
| 7 | 57 | 46 | 11 | 2 | 0 | 0 | 0 |
| 8 | 74 | 62 | 12 | 1 | 0 | 0 | 0 |
| *Median (range)* | 73.5  (37-81) | 62  (32-67) | 11  (5-18) | 1.5  (0-3) | 0 (0-0) | 0 (0-0) | 0 (0-0) |

1 Single nucleotide variants

2 Insertions and deletions

3 Protein-truncating variants. These correspond to variants annotated as nonsense mutations, or frameshift insertions or deletions by GATK4 *Funcotator*.

4 *ClinVar* annotation of pathogenicity within GATK4 *Funcotator* variant annotation.

**Supplementary Table 7.** Variants identified through whole exome sequencing (WES) validation with Sanger sequencing.

| **Case** | **Variant Type** | **Chromosome Number** | **Position** | **Reference** | **Blood** | **Tissue** | **R3-Fwd Primer** | **R3-Rev Primer** | **Product size (bp)** | **Sanger Results** |
| --- | --- | --- | --- | --- | --- | --- | --- | --- | --- | --- |
| 2 | SNV | 12 | 52949518 | C | C | T | GGCCTCTTACCTGGACAGA | TAGGGGTTGGGTGGTTATGG | 243 | No mutation detected |
| 2 | Deletion | 3 | 113294650-113294651 | CAA | CAA | deletion | CCCAAGAGGCGTTCAATAAAG | CATCTATTTTGCATCTTCCCACC | 373 | No mutation detected |
| 3 | SNV | 12 | 52949518 | C | C | T | GGCCTCTTACCTGGACAGA | TAGGGGTTGGGTGGTTATGG | 243 | No mutation detected |
| 3 | SNV | 3 | 165006783 | G | G/A | G/T | GAGCACCTACAATTGGCCAG | ACACGTTTCATTGTAGGGCAC | 492 | No mutation detected |
| 4 | SNV | 12 | 52949518 | C | C | T | GGCCTCTTACCTGGACAGA | TAGGGGTTGGGTGGTTATGG | 243 | No mutation detected |
| 4 | Insertion | 3 | 57860849-57860850 | TC | TC | TAC | ACAGGGCCAGAATCATTTATGT | AGCGTAACTGTTCCTTCCCA | 420 | Mutation found in both T & B |
| 4 | SNV | 2 | 159386356 | G | G | G/T | AATCACCTTGGTCTTTGCCT | TGGTGGTGCAGTTCTTACGA | 437 | No mutation detected |
| 4 | SNV | 15 | 76175545 | T | T | T/C | TGGCCCTCTGTACTTTCTGG | CTACCAGTGTCCCCAGCAAG | 341 | No mutation detected |
| 5 | SNV | 12 | 52949518 | C | C | T | GGCCTCTTACCTGGACAGA | TAGGGGTTGGGTGGTTATGG | 243 | No mutation detected |
| 5 | Deletion | 7 | 77639409-77639418 | GCTGGGACCA | GCTGGGACCA | deletion | TGGACATGATTCAGGGAGCT | ACCTACTTGCCCTGTACATATAC | 361 | No mutation detected |
| 5 | SNV | 7 | 122360949 | G | G | G/T | GGAACATCAACATATTTTGCAGC | CCTCAGCTGTCAGTTCATTCA | 352 | No mutation detected |
| 5 | SNV | 11 | 66232302 | G | G | G/A | TGTTCCTGCAGATTCCAAGAA | CGTATGAGGAAGCTGAGGTAGA | 350 | No mutation detected |
| 6 | SNV | 12 | 52949518 | C | C | T | GGCCTCTTACCTGGACAGA | TAGGGGTTGGGTGGTTATGG | 243 | No mutation detected |
| 7 | SNV | 12 | 52949518 | C | C | T | GGCCTCTTACCTGGACAGA | TAGGGGTTGGGTGGTTATGG | 243 | No mutation detected |
